# Supplementary material for: Characteristics of E-Scooter-Related Maxillofacial Injuries over 2019–2022—Retrospective Study from Poznan, Poland
Source: MDPI journal article supplement (doi:10.3390/jcm12113690), 2023-05-26
Supplement: s1 [file s1]

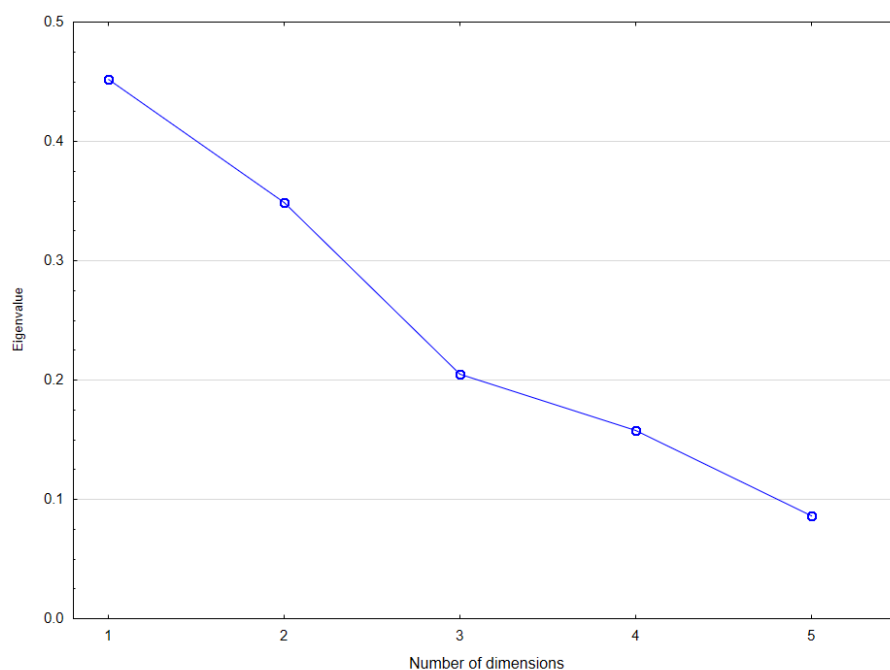

**Figure S1:** Scree plot for multidimensional correspondence analysis.

**Table S1:** Multidimensional correspondence analysis—parameters of determined points.

|                       | x      | Y      | z      | Quality | Relative inertia | X       |       | y       |       | z       |       |
|-----------------------|--------|--------|--------|---------|------------------|---------|-------|---------|-------|---------|-------|
|                       |        |        |        |         |                  | inertia | cos^2 | inertia | cos^2 | Inertia | cos^2 |
| Gender:male           | -0.541 | 0.033  | -0.586 | 0.927   | 0.081            | 0.096   | 0.426 | 0.0004  | 0.002 | 0.248   | 0.499 |
| Gender:female         | 0.788  | -0.048 | 0.852  | 0.927   | 0.119            | 0.140   | 0.426 | 0.001   | 0.002 | 0.361   | 0.499 |
| Alcohol:0             | -0.366 | -0.434 | -0.068 | 0.777   | 0.059            | 0.052   | 0.318 | 0.095   | 0.448 | 0.004   | 0.011 |
| Alcohol:1             | 0.869  | 1.032  | 0.160  | 0.777   | 0.141            | 0.124   | 0.318 | 0.226   | 0.448 | 0.009   | 0.011 |
| Age <= 30 y           | 0.604  | -0.284 | -0.258 | 0.744   | 0.081            | 0.119   | 0.530 | 0.034   | 0.117 | 0.048   | 0.097 |
| Age > 30 y            | -0.878 | 0.412  | 0.375  | 0.744   | 0.119            | 0.174   | 0.530 | 0.050   | 0.117 | 0.070   | 0.097 |
| Fracture:ZMO          | -0.954 | -0.782 | 0.768  | 0.739   | 0.148            | 0.131   | 0.319 | 0.113   | 0.214 | 0.187   | 0.207 |
| Fracture:frontal bone | -0.598 | 1.853  | -0.108 | 0.864   | 0.163            | 0.037   | 0.081 | 0.455   | 0.780 | 0.003   | 0.003 |
| Fracture:mandible     | 0.645  | -0.253 | -0.322 | 0.729   | 0.089            | 0.128   | 0.519 | 0.025   | 0.080 | 0.070   | 0.130 |
